# Supplementary material
Source: publisher figshare collection journal article supplement (https://tandf.figshare.com/ndownloader/files/15584861)
Supplement: Supplementary file 1 [file 15584861]

Supplementary Table 1. This table shows the raw results from dissections of egg and larval stages of *C. obstrictus* and its ectoparasitoids from pods of canola and *Brassica* spp. at 8 different locations in three different years.

| Site | year | No. pods | total eggs | Dead eggs | L1 | Ectoparasitoid larvae | Other  mortality | L3 |
| --- | --- | --- | --- | --- | --- | --- | --- | --- |
| Agassiz spring | 2010 | 3437 | 489 | 319 | 170 | 89 | 21 | 60 |
| Abbotsford 3 winter | 2010 | 1766 | 244 | 14 | 230 | 128 | 15 | 87 |
| Abbotsford 2 winter | 2010 | 1686 | 772 | 627 | 145 | 49 | 5 | 91 |
| Abbotsford winter | 2008 | 1669 | 1102 | 881 | 221 | 58 | 0 | 163 |
| Abbotsford winter | 2009 | 1634 | 1776 | 528 | 1248 | 335 | 28 | 885 |
| Ingersoll winter | 2009 | 2400 | 200 | 32 | 168 | 2 | 8 | 158 |
| Ingersoll winter | 2010 | 2100 | 129 | 1 | 128 | 2 | 28 | 98 |
| Ingersoll spring | 2010 | 2100 | 330 | 132 | 198 | 54 | 72 | 72 |
